# Supplementary material
Source: PubMed Central journal article supplement (PMC5826163)
Supplement: AAC.02069-17_zac003186954s1.pdf [file AAC.02069-17_zac003186954s1.pdf]

Supplemental Material

***Neisseria cinerea* with high ceftriaxone MIC is an origin of ceftriaxone and cefixime resistance-mediating *penA* sequences in *Neisseria gonorrhoeae***

**Gene Igawa,<sup>a</sup> Yuka Yamagishi,<sup>b</sup> Ken-Ichi Lee,<sup>a</sup> Misato Dorin,<sup>a</sup> Ken Shimuta,<sup>a</sup> Hiroyuki Suematsu,<sup>b</sup> Shu-Ichi Nakayama,<sup>a</sup> Hiroshige Mikamo,<sup>b</sup> Magnus Unemo<sup>c</sup> and Makoto Ohnishi<sup>a, d\*</sup>**

Department of Bacteriology I, National Institute of Infectious Diseases, Tokyo, Japan<sup>a</sup>; Department of Clinical Infectious Diseases, Aichi Medical University, Aichi, Japan<sup>b</sup>; WHO Collaborating Centre for Gonorrhoea and other STIs, Department of Laboratory Medicine, Microbiology, Örebro University Hospital, Örebro, Sweden<sup>c</sup>; Antimicrobial Resistance Research Center National Institute of Infectious Diseases, Tokyo, Japan<sup>d</sup>

\*Corresponding author. Department of Bacteriology I, National Institute of Infectious Diseases, 1-23-1 Toyama, Shinjuku, Tokyo, 162-8640 Japan. Phone: +81 (3) 5285-1111, Fax +81 (3) 5285-1163. E-mail: ohnishi7@nih.go.jp.

**Running title:** Gene reservoir of ceftriaxone resistance

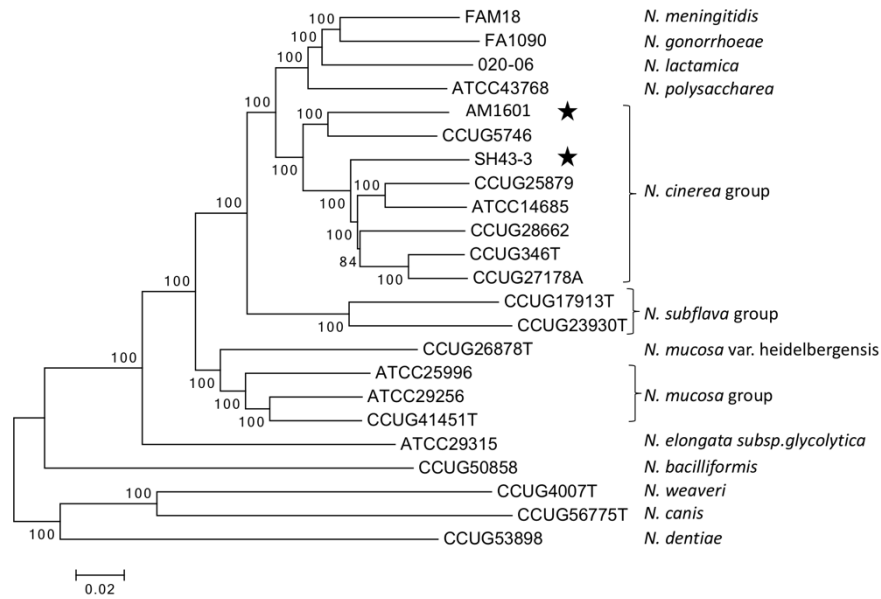

Figure. S1. Phylogenetic relatedness of *Neisseria* spp. based on concatenated sequences of 53 ribosomal protein genes (*rps*). The concatenated *rps* sequences of 21 representatives of different *Neisseria* spp. (1) and the two *Neisseria cinerea* strains AM1601 and SH43-3 (indicated by asterisk), which were species verified in the present study, were analyzed using neighbor-joining method. The percentages of replicate trees in which the associated taxa were clustered together in the bootstrap test (500 replicates) are included.

#### Method

**Ribosomal protein sequence (*rps*) comparison.** To species identify the *N. cinerea* strains, 53 *rps* sequences derived from the WGS sequences, including previously described WGS sequences from *Neisseria* species (1), were used. Briefly, the SNPs of the 53 *rps* alleles were extracted and imported into MEGA version 7 software (2), and a phylogenetic tree was constructed using the neighbor joining method (2).

- (1) Bennett JS, Jolley KA, Earle SG, Corton C, Bentley SD, Parkhill J, Maiden MCJ. 2012. A genomic approach to bacterial taxonomy: An examination and proposed reclassification of species within the genus *Neisseria*. *Microbiol (United Kingdom)* 158:1570–

1580.

- (2) Kumar S, Stecher G, Tamura K. 2016. MEGA7: Molecular Evolutionary Genetics Analysis Version 7.0 for Bigger Datasets. *Mol Biol Evol* 33:1870–1874.
